# Supplementary material for: High prevalence of hyposalivation in individuals with neurofibromatosis 1: a case–control study
Source: Springer Nature journal article supplement (doi:10.1186/s13023-015-0239-4), 2015-01-01
Supplement: MOESM1 [file 9776062]

Additional file 1 – Details of the clinical data of the study group (NF1 group)

| Code | Age | Sex | Plexiform neurofibroma close to or involving major salivary glands areas | Smoker | Alcohol user | Hyposalivation-inducing drugs | Intake less than 2 liters of liquid daily | Caffeinated or stimulant drink use | Mouth breather | UWSFR mL/min | UWSFR    | Oral candidiasis | TCI | TCI (%) |
|------|-----|-----|--------------------------------------------------------------------------|--------|--------------|-------------------------------|-------------------------------------------|------------------------------------|----------------|--------------|----------|------------------|-----|---------|
| 1    | 46  | F   | Yes                                                                      | No     | No           | No                            | No                                        | No                                 | No             | 0.4          | Normal   | No               | 7   | 38      |
| 2    | 45  | M   | No                                                                       | No     | No           | No                            | Yes                                       | Yes                                | Yes            | 0.48         | Normal   | No               | 7   | 38      |
| 3    | 67  | F   | No                                                                       | No     | No           | Yes                           | Yes                                       | No                                 | No             | 0.02         | Very low | No               | 4   | 22      |
| 4    | 35  | F   | Yes                                                                      | No     | No           | Yes                           | No                                        | No                                 | Yes            | 0.64         | Normal   | Yes              | 10  | 55      |
| 5    | 71  | F   | No                                                                       | No     | Yes          | Yes                           | No                                        | No                                 | No             | 0.12         | Low      | No               | 5   | 27      |
| 6    | 23  | F   | No                                                                       | No     | No           | No                            | No                                        | No                                 | No             | 0.04         | Very low | No               | 0   | 0       |
| 7    | 52  | F   | No                                                                       | No     | No           | No                            | No                                        | Yes                                | No             | 0.64         | Normal   | No               | 13  | 72      |
| 8    | 46  | F   | No                                                                       | No     | No           | Yes                           | No                                        | Yes                                | Yes            | 0.24         | Low      | No               | 2   | 11      |
| 9    | 35  | M   | No                                                                       | No     | No           | No                            | Yes                                       | Yes                                | No             | 0.24         | Low      | No               | 8   | 44      |
| 10   | 43  | M   | No                                                                       | No     | No           | No                            | Yes                                       | Yes                                | No             | 0.02         | Very low | No               | 13  | 72      |
| 11   | 44  | F   | Yes                                                                      | No     | No           | No                            | Yes                                       | No                                 | Yes            | 0.1          | Low      | No               | 11  | 61      |
| 12   | 54  | F   | No                                                                       | No     | No           | No                            | Yes                                       | Yes                                | No             | 0.04         | Very low | Yes              | 1   | 6       |
| 13   | 67  | F   | No                                                                       | No     | Yes          | Yes                           | No                                        | No                                 | No             | 0.02         | Very low | Yes              | 7   | 38      |
| 14   | 37  | F   | No                                                                       | No     | No           | No                            | No                                        | No                                 | No             | 0.4          | Normal   | No               | 15  | 83      |
| 15   | 58  | F   | No                                                                       | No     | No           | Yes                           | Yes                                       | No                                 | Yes            | 0.24         | Low      | No               | 12  | 66      |
| 16   | 31  | F   | No                                                                       | Yes    | No           | Yes                           | Yes                                       | Yes                                | Yes            | 0.6          | Normal   | No               | 6   | 33      |
| 17   | 26  | F   | No                                                                       | No     | No           | No                            | No                                        | Yes                                | Yes            | 1.2          | Normal   | No               | 7   | 38      |
| 18   | 41  | F   | No                                                                       | No     | Yes          | No                            | No                                        | Yes                                | Yes            | 0.07         | Very low | No               | 10  | 55      |
| 19   | 56  | F   | No                                                                       | No     | No           | No                            | No                                        | No                                 | Yes            | 0.04         | Very low | Yes              | 3   | 16      |
| 20   | 45  | F   | No                                                                       | No     | No           | Yes                           | No                                        | No                                 | No             | 0.02         | Very low | Yes              | 12  | 66      |
| 21   | 55  | F   | No                                                                       | Yes    | Yes          | Yes                           | No                                        | No                                 | Yes            | 0.6          | Normal   | Yes              | 10  | 55      |
| 22   | 66  | M   | No                                                                       | No     | Yes          | Yes                           | Yes                                       | Yes                                | Yes            | 0.4          | Normal   | Yes              | 15  | 83      |
| 23   | 54  | F   | No                                                                       | No     | No           | Yes                           | No                                        | No                                 | Yes            | 0.04         | Very low | Yes              | 18  | 100     |
| 24   | 44  | F   | No                                                                       | No     | No           | Yes                           | Yes                                       | Yes                                | Yes            | 0.2          | Low      | No               | 6   | 33      |
| 25   | 37  | F   | No                                                                       | No     | No           | Yes                           | No                                        | Yes                                | Yes            | 0            | Very low | No               | 2   | 11      |
| 26   | 31  | M   | No                                                                       | No     | Yes          | No                            | NE                                        | NE                                 | NE             | 0.04         | Very low | No               | 3   | 16      |
| 27   | 18  | M   | No                                                                       | No     | No           | No                            | No                                        | No                                 | No             | 0.4          | Normal   | No               | 16  | 88      |
| 28   | 15  | F   | No                                                                       | No     | No           | Yes                           | No                                        | No                                 | No             | 0.16         | Low      | No               | 4   | 22      |
| 29   | 37  | M   | No                                                                       | No     | No           | No                            | NE                                        | NE                                 | NE             | 0.2          | Low      | No               | 15  | 83      |
| 30   | 42  | F   | No                                                                       | No     | No           | Yes                           | No                                        | Yes                                | Yes            | 0.12         | Low      | Yes              | 14  | 77      |
| 31   | 64  | F   | No                                                                       | No     | No           | Yes                           | No                                        | No                                 | No             | 0.04         | Very low | Yes              | 11  | 61      |
| 32   | 47  | M   | No                                                                       | Yes    | Yes          | No                            | No                                        | No                                 | No             | 0.4          | Normal   | No               | 14  | 77      |
| 33   | 39  | F   | No                                                                       | No     | Yes          | Yes                           | Yes                                       | No                                 | No             | 0.24         | Low      | No               | 12  | 66      |
| 34   | 46  | F   | No                                                                       | No     | No           | No                            | Yes                                       | No                                 | Yes            | 0.02         | Very low | No               | 15  | 83      |
| 35   | 28  | F   | Yes                                                                      | No     | No           | No                            | Yes                                       | Yes                                | No             | 1            | Normal   | No               | 6   | 33      |

|    |    |   |    |     |     |     |     |     |     |      |          |     |    |    |
|----|----|---|----|-----|-----|-----|-----|-----|-----|------|----------|-----|----|----|
| 36 | 15 | F | No | No  | No  | No  | Yes | Yes | Yes | 0.24 | Low      | No  | 9  | 50 |
| 37 | 22 | M | No | No  | No  | No  | Yes | Yes | No  | 0.08 | Very low | No  | 9  | 50 |
| 38 | 54 | F | No | No  | No  | No  | Yes | No  | No  | 0.8  | Normal   | No  | 14 | 77 |
| 39 | 21 | M | No | No  | No  | No  | Yes | Yes | Yes | 0.24 | Low      | No  | 4  | 22 |
| 40 | 34 | F | No | No  | No  | Yes | No  | Yes | Yes | 0.8  | Normal   | No  | 15 | 83 |
| 41 | 48 | M | No | No  | No  | Yes | Yes | No  | No  | 0.4  | Normal   | No  | 15 | 83 |
| 42 | 41 | F | No | No  | No  | No  | Yes | Yes | No  | 0.2  | Low      | No  | 13 | 72 |
| 43 | 29 | M | No | No  | No  | No  | No  | Yes | Yes | 0.68 | Normal   | Yes | 2  | 11 |
| 44 | 75 | M | No | No  | No  | No  | Yes | No  | No  | 0.8  | Normal   | No  | 13 | 72 |
| 45 | 39 | M | No | No  | No  | No  | No  | No  | No  | 0.4  | Normal   | No  | 3  | 16 |
| 46 | 41 | F | No | No  | No  | Yes | Yes | No  | No  | 1    | Normal   | No  | 13 | 72 |
| 47 | 62 | F | No | No  | No  | Yes | Yes | No  | Yes | 0.2  | Low      | No  | 4  | 22 |
| 48 | 29 | F | No | No  | No  | Yes | NE  | NE  | NE  | 0.4  | Normal   | No  | 9  | 50 |
| 49 | 28 | F | No | Yes | Yes | Yes | Yes | Yes | Yes | 0.2  | Low      | No  | 5  | 27 |

UWSFR: Unstimulated whole saliva flow rate; mL/min: milliliters per minute; TCI: Tongue Coating Index
