# Supplementary material for: High prevalence of hyposalivation in individuals with neurofibromatosis 1: a case–control study
Source: Springer Nature journal article supplement (doi:10.1186/s13023-015-0239-4), 2015-01-01
Supplement: MOESM2 [file 9776062]

Additional file 2 – Details of the clinical data of the control group

| Code | Age | Sex | Smoker | Alcohol user | Hyposalivation-inducing drugs | UWSFR mL/min | UWSFR    |
|------|-----|-----|--------|--------------|-------------------------------|--------------|----------|
| 1    | 48  | F   | No     | No           | No                            | 0.9          | Normal   |
| 2    | 44  | M   | No     | No           | No                            | 1            | Normal   |
| 3    | 67  | F   | No     | No           | Yes                           | 0.16         | Low      |
| 4    | 34  | F   | Yes    | No           | No                            | 0.2          | Low      |
| 5    | 71  | F   | No     | No           | Yes                           | 0.8          | Normal   |
| 6    | 24  | F   | No     | No           | Yes                           | 0.8          | Normal   |
| 7    | 53  | F   | No     | No           | Yes                           | 0.16         | Low      |
| 8    | 46  | F   | No     | No           | Yes                           | 1            | Normal   |
| 9    | 37  | M   | Yes    | No           | No                            | 0.4          | Normal   |
| 10   | 43  | M   | Yes    | Yes          | No                            | 0.25         | Low      |
| 11   | 45  | F   | No     | No           | No                            | 0.4          | Normal   |
| 12   | 54  | F   | No     | No           | Yes                           | 0.04         | Very Low |
| 13   | 65  | F   | No     | No           | Yes                           | 0.4          | Normal   |
| 14   | 38  | F   | No     | No           | No                            | 0.8          | Normal   |
| 15   | 60  | F   | No     | No           | Yes                           | 1            | Normal   |
| 16   | 31  | F   | Yes    | No           | No                            | 0.6          | Normal   |
| 17   | 28  | F   | No     | No           | No                            | 1.1          | Normal   |
| 18   | 41  | F   | No     | No           | No                            | 0            | Very low |
| 19   | 56  | F   | No     | No           | Yes                           | 0.32         | Normal   |
| 20   | 45  | F   | No     | Yes          | No                            | 0.27         | Low      |
| 21   | 55  | F   | No     | Yes          | Yes                           | 0.2          | Low      |
| 22   | 66  | M   | No     | Yes          | Yes                           | 1.2          | Normal   |
| 23   | 53  | F   | Yes    | Yes          | No                            | 0.42         | Normal   |
| 24   | 43  | F   | Yes    | Yes          | No                            | 0.8          | Normal   |
| 25   | 38  | F   | No     | No           | Yes                           | 1            | Normal   |
| 26   | 32  | M   | No     | Yes          | No                            | 2            | Normal   |
| 27   | 16  | M   | No     | No           | No                            | 0.3          | Normal   |
| 28   | 15  | F   | No     | No           | No                            | 0.5          | Normal   |
| 29   | 36  | M   | No     | No           | No                            | 1            | Normal   |
| 30   | 39  | F   | No     | No           | No                            | 0.4          | Normal   |
| 31   | 63  | F   | Yes    | No           | Yes                           | 1.4          | Normal   |
| 32   | 45  | M   | No     | No           | No                            | 0.16         | Low      |
| 33   | 39  | F   | No     | No           | No                            | 0.8          | Normal   |
| 34   | 47  | F   | No     | No           | Yes                           | 0.7          | Normal   |
| 35   | 29  | F   | No     | No           | No                            | 0.4          | Normal   |
| 36   | 14  | F   | No     | No           | No                            | 0.4          | Normal   |

|    |    |   |     |     |     |      |          |
|----|----|---|-----|-----|-----|------|----------|
| 37 | 24 | M | Yes | No  | No  | 1    | Normal   |
| 38 | 54 | F | No  | No  | Yes | 0.5  | Normal   |
| 39 | 23 | M | No  | No  | No  | 0.3  | Normal   |
| 40 | 35 | F | No  | No  | No  | 0.9  | Normal   |
| 41 | 48 | M | Yes | Yes | No  | 0    | Very Low |
| 42 | 41 | F | No  | No  | No  | 2    | Normal   |
| 43 | 26 | M | No  | Yes | No  | 1.1  | Normal   |
| 44 | 77 | M | No  | Yes | Yes | 0.5  | Normal   |
| 45 | 40 | M | No  | No  | No  | 0.8  | Normal   |
| 46 | 41 | F | No  | No  | No  | 0.4  | Normal   |
| 47 | 62 | F | No  | No  | Yes | 0.4  | Normal   |
| 48 | 29 | F | No  | No  | No  | 1.2  | Normal   |
| 49 | 28 | F | No  | No  | Yes | 0.02 | Very low |

F: Female; M: Male; UWSFR: Unstimulated whole salivary flow rate; NE: Not evaluated
