# Supplementary material for: High prevalence of hyposalivation in individuals with neurofibromatosis 1: a case–control study
Source: Springer Nature journal article supplement (doi:10.1186/s13023-015-0239-4), 2015-01-01
Supplement: MOESM3 [file 9776062]

|           |            |            |            |            |            |            |            |            |            |            |    |            |            |            |
|-----------|------------|------------|------------|------------|------------|------------|------------|------------|------------|------------|----|------------|------------|------------|
| <b>38</b> | No         | <b>Yes</b> | No         | <b>Yes</b> | No         | No         | <b>Yes</b> | No         | No         | <b>Yes</b> | No | No         | No         | No         |
| <b>39</b> | <b>Yes</b> | <b>Yes</b> | <b>Yes</b> | <b>Yes</b> | <b>Yes</b> | <b>Yes</b> | No         | No         | No         | No         | No | No         | <b>Yes</b> | No         |
| <b>40</b> | <b>Yes</b> | <b>Yes</b> | No         | <b>Yes</b> | <b>Yes</b> | <b>Yes</b> | No         | No         | No         | No         | No | <b>Yes</b> | No         | No         |
| <b>41</b> | No         | No         | No         | <b>Yes</b> | <b>Yes</b> | No         | No         | No         | <b>Yes</b> | No         | No | No         | No         | No         |
| <b>42</b> | No         | No         | No         | No         | No         | No         | No         | No         | No         | No         | No | No         | No         | <b>Yes</b> |
| <b>43</b> | <b>Yes</b> | <b>Yes</b> | <b>Yes</b> | <b>Yes</b> | <b>Yes</b> | <b>Yes</b> | No         | No         | No         | No         | No | No         | <b>Yes</b> | No         |
| <b>44</b> | No         | No         | No         | No         | No         | No         | <b>Yes</b> | <b>Yes</b> | No         | No         | No | No         | No         | No         |
| <b>45</b> | No         | No         | No         | No         | No         | No         | <b>Yes</b> | <b>Yes</b> | No         | No         | No | No         | No         | No         |
| <b>46</b> | No         | No         | No         | No         | No         | No         | No         | No         | No         | No         | No | No         | No         | <b>Yes</b> |
| <b>47</b> | No         | No         | <b>Yes</b> | <b>Yes</b> | No         | No         | No         | No         | <b>Yes</b> | No         | No | No         | No         | No         |
| <b>48</b> | NE         | NE         | NE         | NE         | NE         | NE         | NE         | NE         | NE         | NE         | NE | NE         | NE         | NE         |
| <b>49</b> | No         | <b>Yes</b> | No         | <b>Yes</b> | No         | No         | <b>Yes</b> | No         | No         | <b>Yes</b> | No | No         | No         | No         |

Question 1: Do you feel dry oral mucosa sensation?; Question 2: Do you feel dry lips sensation?; Question 3: Do you have difficult to swallow dry food?; Question 4: Do you drink liquids to aid swallowing dry food?; Question 5: Do you feel change in saliva viscosity?; Question 6: Do you feel a decreased amount of saliva in your mouth?; Question 7: Do you feel enough or increased amount of saliva in your mouth?; Score: number of positive answers; NE: Not evaluated
